# Supplementary material
Source: MDPI journal article supplement (https://www.mdpi.com/2073-4433/12/5/631)
Supplement: s1 [file s1]

# Pesticide Inhalation Exposure of Applicators and Bystanders Using Conventional and Innovative Cropping Systems in the Valencian Region, Spain

Esther Fuentes <sup>1</sup>, Antonio López <sup>1</sup>, María Ibáñez <sup>2</sup>, Vicent Yusa <sup>1,3,4</sup>, Amalia Muñoz <sup>5</sup>, Teresa Vera <sup>5</sup>, Esther Borrás <sup>5</sup>, Héctor Calvete-Sogo <sup>5</sup> and Clara Coscollà <sup>1,\*</sup>

<sup>1</sup> Foundation for the Promotion of Health and Biomedical Research in the Valencia Region, FISABIO-Public Health, 21, Avenida Catalunya, 46020 Valencia, Spain; fuentes\_estfer@gva.es (E.F.); lopez\_anttob@gva.es (A.L.); yusa\_vic@gva.es (V.Y.)

<sup>2</sup> Environmental and Public Health Analytical Chemistry, Research Institute for Pesticides and Water, University Jaume I, S/N, Avda Sos Baynat, Castelló de la Plana, 12071 Castelló, Spain; ibanezm@uji.es

<sup>3</sup> Public Health Laboratory of Valencia, 21, Avenida Catalunya, 46020 Valencia, Spain

<sup>4</sup> Analytical Chemistry Department, University of Valencia, Edifici Jeroni Muñoz, Carrer del Dr. Moliner 50, 46100 Burjassot, Spain

<sup>5</sup> Insitituto Universitario UMH-CEAM, C/Charles Darwin, 14, Parque Tecnológico, Paterna, 46980 Valencia, Spain; amalia@ceam.es (A.M.); teresa@ceam.es (T.V.); esther@ceam.es (E.B.); hectorcalvete@ceam.es (H.C.)

\* Correspondence: coscolla\_cla@gva.es; Tel.: +34-96192-6333

| TYPE      | CAPTIONS                                                                                              | PAGE |
|-----------|-------------------------------------------------------------------------------------------------------|------|
| Table S1  | Pesticides vapour pressures                                                                           | 2    |
| Table S2  | Conventional Treatments, 2017 season                                                                  | 2    |
| Table S3  | Conventional Treatments, 2018 season                                                                  | 3, 4 |
| Table S4  | Alternative Treatments, 2017 season                                                                   | 4    |
| Table S5  | Alternative Treatments, 2018 season                                                                   | 4, 5 |
| Table S6  | Relationship between atmospheric parameters and drift effect.<br>Conventional treatment, 2017 season  | 6    |
| Table S7  | Relationship between atmospheric parameters and drift effect.<br>Conventional treatment, 2018 season. | 6, 7 |
| Figure S1 | Temperature vs Drift effect                                                                           | 8    |
| Figure S2 | Wind rate vs Drift effect                                                                             | 9    |
| Figure S3 | Humidity vs Drift effect                                                                              | 9    |

**Table S1.** Pesticides vapour pressures

| Compound            | Vapour pressure at 20 °C (mPa) |
|---------------------|--------------------------------|
| Imidacloprid        | $4.0 \times 10^{-7}$           |
| Oxamyl              | 0.018                          |
| Difenoconazole      | $3.33 \times 10^{-5}$          |
| Acetamiprid         | $1.73 \times 10^{-4}$          |
| Azoxistrobin        | $1.1 \times 10^{-7}$           |
| Bupirimate          | 0.057                          |
| Fosetyl-Al          | $1.00 \times 10^{-4}$          |
| Oxyfluorfen         | 0.026                          |
| Methyl-Chlorpyrifos | 3.0                            |
| Azadirachtin        | $2.0 \times 10^{-4}$           |
| Lambda- Cyhalotrin  | $3.6 \times 10^{-10}$          |

**Table S2.** Conventional Treatments, 2017 season

| CONVENTIONAL TREATMENT 2017 |      |      |             |               |                           |            |       |                    |            |
|-----------------------------|------|------|-------------|---------------|---------------------------|------------|-------|--------------------|------------|
| Location                    | Area | Plot | Crop        | Type          | Surface (m <sup>2</sup> ) | Date       | Mode  | Pesticide          | Vol (L/ha) |
| Alcudia                     | 29   | 36   | Citrus      | Satsuma       | 3200                      | 03/07/2018 | Turbo | Imidacloprid       | 1400       |
| Alcudia                     | 29   | 36   | Citrus      | Satsuma       | 3200                      | 23/08/2018 | Turbo | Imidacloprid       | 1400       |
| Alcudia                     | 26   | 443  | Stone Fruit | Nectarine     | 2090                      | 12/07/2017 | Turbo | Ethyl-Chlorpyrifos | 1400       |
| Alcudia                     | 25   | 37   | Caqui       | Red Brilliant | 8100                      | 01/08/2017 | Turbo | Azadirachtin       | 1400       |
| Alcudia                     | 26   | 203  | Citrus      | Satsuma       | 4700                      | 02/08/2017 | Turbo | Azadirachtin       | 1400       |
| Alcudia                     | 26   | 203  | Citrus      | Satsuma       | 4700                      | 01/09/2017 | Turbo | Azadirachtin       | 1400       |
| Alcudia                     | 26   | 203  | Citrus      | Satsuma       | 4700                      | 25/09/2017 | Turbo | Azadirachtin       | 1400       |
| Alcudia                     | 29   | 98a  | Citrus      | Satsuma       | 2500                      | 04/09/2017 | Turbo | Metalaxyl          | 1400       |

**Table S3.** Conventional Treatments, 2018 season

| CONVENTIONAL TREATMENT 2018 |      |      |             |               |                          |            |       |                     |                |              |
|-----------------------------|------|------|-------------|---------------|--------------------------|------------|-------|---------------------|----------------|--------------|
| Location                    | Area | Plot | Crop        | Type          | Surface(m <sup>2</sup> ) | Date       | Mode  | Pesticide           | vol.<br>(L/ha) | Dose (mL/hL) |
| Alcudia                     | 27   | 99   | Watermelon  | -             | -                        | 17/04/2018 |       | Imidacloprid        | -              | -            |
| Alcudia                     | 26   | 203  | Citrus      | Satsuma       | 4500                     | 06/07/2018 | Turbo | Imidacloprid        | 2400           | 50           |
| Alcudia                     | 26   | 203  | Citrus      | Satsuma       | 4500                     | 18/07/2018 | Turbo | Imidacloprid        | 2400           | 50           |
| Alcudia                     | 26   | 203  | Citrus      | Satsuma       | 4500                     | 08/08/2018 | Turbo | Imidacloprid        | 1400           | 50           |
| Alcudia                     | 27   | 99   | WaterMelon  | -             | -                        | 30/04/2018 |       | Oxamyl              | -              | -            |
| Alcudia                     | 26   | 443  | Stone Fruit | Nectarine     | 2090                     | 15/05/2018 | Turbo | Difenoconazole      | 1400           | 30           |
| Alcudia                     | 25   | 37   | Persimmon   | Red Brilliant | 8100                     | 11/06/2018 | Turbo | Difenoconazole      | 2400           | 25           |
| Alcudia                     | 26   | 443  | Stone Fruit | Nectarine     | 2090                     | 18/05/2018 | Turbo | Acetamiprid         | 1400           | 400*         |
| Alcudia                     | 26   | 203  | Citrus      | Satsuma       | 4500                     | 21/06/2018 | Turbo | Acetamiprid         | 2400           | 25*          |
| Alcudia                     | 26   | 203  | Persimmon   | Satsuma       | 4500                     | 25/05/2018 | Turbo | Azoxistrobin        | 2400           | 100          |
| Alcudia                     | 27   | 99   | WaterMelon  | -             | -                        | 31/05/2018 |       | Bupirimate          | -              | -            |
| Alcudia                     | 27   | 99   | WaterMelon  | -             | -                        | 22/06/2018 |       | Bupirimate          | -              | -            |
| Alcudia                     | 29   | 98a  | Citrus      | Satsuma       | 2500                     | 12/06/2018 | Turbo | Fosetyl             | 2400           | 250*         |
| Alcudia                     | 29   | 98a  | Citrus      | Satsuma       | 2500                     | 13/09/2018 | Turbo | Fosetyl             | 1400           | 250*         |
| Alcudia                     | 29   | 98a  | Citrus      | Satsuma       | 2500                     | 09/07/2018 |       | Oxyfluorfen         | -              | -            |
| Alcudia                     | 24   | 4    | Stone Fruit | 117           | 5906                     | 27/06/2018 | Turbo | Methyl-Chlorpyrifos | 1400           | 300          |
| Alcudia                     | 24   | 4    | Stone Fruit | 117           | 5906                     | 16/07/2018 | Turbo | Methyl-Chlorpyrifos | 1400           | 300          |
| Alcudia                     | 24   | 4    | Stone Fruit | 117           | 5906                     | 30/07/2018 | Turbo | Methyl-Chlorpyrifos | 1400           | 300          |
| Alcudia                     | 25   | 37   | Persimmon   | Red Brilliant | 8100                     | 04/07/2018 | Turbo | Azadirachtin        | 2400           | 100          |
| Alcudia                     | 25   | 37   | Persimmon   | Red Brilliant | 8100                     | 01/08/2018 | Turbo | Azadirachtin        | 1400           | 100          |
| Alcudia                     | 25   | 37   | Persimmon   | Red Brilliant | 8100                     | 20/08/2018 | Turbo | Azadirachtin        | 1400           | 100          |
| Alcudia                     | 29   | 98a  | Citrus      | Satsuma       | 2500                     | 21/08/2018 | Turbo | Azadirachtin        | 1400           | 10           |
| Alcudia                     | 26   | 203  | Citrus      | Satsuma       | 4500                     | 03/08/2018 |       | Azadirachtin        | -              | -            |
| Alcudia                     | 29   | 98b  | Persimmon   | Red Brilliant | 5400                     | 12/09/2018 | Turbo | Azadirachtin        | 1400           | 100          |
| Alcudia                     | 25   | 37   | Persimmon   | Red Brilliant | 8100                     | 18/09/2018 | Turbo | Azadirachtin        | 1400           | 100          |

|         |    |     |           |               |      |            |       |                   |      |     |
|---------|----|-----|-----------|---------------|------|------------|-------|-------------------|------|-----|
| Alcudia | 25 | 37  | Persimmon | Red Brilliant | 8100 | 01/10/2018 | Turbo | Azadirachtin      | 800  | 100 |
| Alcudia | 29 | 98b | Persimmon | Red Brilliant | 5400 | 11/10/2018 | Turbo | Azadirachtin      | 800  | 100 |
| Alcudia | 29 | 36  | Citrus    | Satsuma       | 3200 | 19/09/2018 | Turbo | Lambda-Cyhalotrin | 1400 | 10  |
| Alcudia | 29 | 36  | Citrus    | Satsuma       | 3200 | 02/10/2018 | Turbo | Lambda-Cyhalotrin | 1400 | 10  |
| Alcudia | 29 | 36  | Citrus    | Satsuma       | 3200 | 15/10/2018 | Turbo | Lambda-Cyhalotrin | 1400 | 10  |

\*Solid commercial product, dose units: g/hL

**Table S4.** Alternative Treatments, 2017 season

| ALTERNATIVE TREATMENT 2017 |      |      |            |              |                          |            |            |              |           |              |
|----------------------------|------|------|------------|--------------|--------------------------|------------|------------|--------------|-----------|--------------|
| Location                   | Area | Plot | Crop       | Type         | Surface(m <sup>2</sup> ) | Date       | Mode       | Pesticide    | Vol(L/ha) | Dose (mL/hL) |
| Alcudia                    | 26   | 140  | StoneFruit | Nectarine    | 7690                     | 03/07/2017 | Irrigation | Imidacloprid | -         | -            |
| Alcudia                    | 4    | 121a | Persimmon  | RedBrilliant | 13,047                   | 09/08/2017 | Irrigation | Azadirachtin | 1.3       | -            |
| Alcudia                    | 26   | 140  | Citrus     | Satsuma      | 7690                     | 25/09/2017 | Irrigation | Azadirachtin | -         | 50           |

**Table S5.** Alternative Treatments, 2018 season

| ALTERNATIVE TREATMENT 2018 |      |      |            |              |                          |            |            |                |              |  |
|----------------------------|------|------|------------|--------------|--------------------------|------------|------------|----------------|--------------|--|
| Location                   | Area | Plot | Crop       | Type         | Surface(m <sup>2</sup> ) | Date       | Mode       | Pesticide      | Dose (mL/hL) |  |
| Alcudia                    | 25   | 20   | WaterMelon | -            | -                        | 18/04/2018 | Irrigation | Imidacloprid   | -            |  |
| Alcudia                    | 26   | 140  | Citrus     | Satsuma      | 7690                     | 10/07/2018 | Irrigation | Imidacloprid   | 50           |  |
| Alcudia                    | 25   | 107  | Citrus     | Satsuma      | 6618                     | 17/07/2018 | Irrigation | Imidacloprid   | 50           |  |
| Alcudia                    | 26   | 140  | Citrus     | Satsuma      | 7690                     | 02/08/2018 | Irrigation | Imidacloprid   | 50           |  |
| Alcudia                    | 25   | 20   | Melon      | -            | -                        | 22/05/2018 | Irrigation | Oxamyl         | -            |  |
| Alcudia                    | 4    | 121a | Persimmon  | RedBrilliant | 13,407                   | 20/06/2018 | Irrigation | Difenoconazole | 25           |  |
| Alcudia                    | 4    | 121b | Citrus     | Satsuma      | 2000                     | 20/06/2018 | Irrigation | Acetamiprid    | 25*          |  |
| Alcudia                    | 25   | 20   | Watermelon | -            | -                        | 21/06/2018 | Irrigation | Bupirimate     | -            |  |
| Alcudia                    | 4    | 121a | Persimmon  | RedBrilliant | 13,407                   | 08/06/2018 | Irrigation | Azoxystrobin   | 100          |  |
| Alcudia                    | 4    | 121b | Citrus     | Satsuma      | 2000                     | 08/06/2018 | Irrigation | Fosetyl-Al     | 600*         |  |
| Alcudia                    | 25   | 107  | Citrus     | Satsuma      | 6618                     | 20/09/2018 | Irrigation | Fosetyl-Al     | 600*         |  |
| Alcudia                    | 4    | 121b | Citrus     | Satsuma      | 2000                     | 13/07/2018 | Irrigation | Oxyfluorfen    | 30           |  |

|         |    |      |             |              |        |            |            |               |     |
|---------|----|------|-------------|--------------|--------|------------|------------|---------------|-----|
| Alcudia | 26 | 143  | Persimon    | RedBrilliant | 6525   | 29/06/2018 | Irrigation | Azadirachtin  | 100 |
| Alcudia | 4  | 121b | Citrus      | Satsuma      | 2000   | 22/08/2018 | Irrigation | Azadirachtin  | 10  |
| Alcudia | 26 | 306  | Stone Fruit | UFO-4        | 5612   | 25/06/2018 | Irrigation | Biorend       | 50  |
| Alcudia | 26 | 306  | Stone Fruit | UFO-4        | 5612   | 31/07/2018 | Irrigation | Biorend       | 50  |
| Alcudia | 26 | 140  | Citrus      | Satsuma      | 7690   | 02/08/2018 | Irrigation | Biorend       | 50  |
| Alcudia | 26 | 306  | Stone Fruit | UFO-4        | 5612   | 03/08/2018 | Irrigation | Biorend       | 50  |
| Alcudia | 4  | 121a | Persimmon   | RedBrilliant | 13,407 | 22/08/2018 | Irrigation | Biorend       | 50  |
| Alcudia | 26 | 140  | Citrus      | Satsuma      | 7690   | 14/09/2018 | Irrigation | Biorend       | 50  |
| Alcudia | 26 | 143  | Persimmon   | RedBrilliant | 6525   | 14/09/2018 | Irrigation | Biorend       | 50  |
| Alcudia | 26 | 308  | Persimmon   | RedBrilliant | 4779   | 24/09/2018 | Irrigation | Biorend       | 50  |
| Alcudia | 25 | 107  | Citrus      | Satsuma      | 6618   | 24/09/2018 | Irrigation | Biorend       | 50  |
| Alcudia | 26 | 143  | Persimmon   | RedBrilliant | 6525   | 05/10/2018 | Irrigation | Biorend       | 50  |
| Alcudia | 26 | 140  | Citrus      | Satsuma      | 7690   | 05/10/2018 | Irrigation | Biorend       | 50  |
| Alcudia | 4  | 121a | Persimmon   | RedBrilliant | 13407  | 16/10/2018 | Irrigation | Biorend       | 50  |
| Alcudia | 4  | 121b | Citrus      | Satsuma      | 2000   | 16/10/2018 | Irrigation | Biorend       | 50  |
| Alcudia | 26 | 306  | Stone Fruit | UFO-4        | 5612   | 29/06/2018 | Irrigation | Tebuconazole  | 60  |
| Alcudia | 25 | 115  | Stone Fruit | UFO-5        | 7098   | 17/07/2018 | Irrigation | Pendimethalin | 300 |

---

\*Solid commercial product, dose units: g/hL

**Table S6.** Relationship between atmospheric parameters and drift effect.  
Conventional treatment, 2017 season.

| Pesticide              | Day        | Temp.Min<br>(°C) | Temp.Max<br>(°C) | Hum.Min<br>(%) | Hum.Max<br>(%) | WS.Min<br>(Km/h) | WS.Max<br>(Km/h) | Conc. Crop<br>Sampler<br>(pg/m <sup>3</sup> ) | Conc. Drift<br>Sampler<br>(pg/m <sup>3</sup> ) | %<br>Drift<br>Effect |
|------------------------|------------|------------------|------------------|----------------|----------------|------------------|------------------|-----------------------------------------------|------------------------------------------------|----------------------|
| Imidacloprid           | 03/07/2018 | 18.1             | 27.5             | 50             | 77             | 2                | 10               | 262250.91                                     | 123511.23                                      | 47                   |
| Imidacloprid           | 23/08/2018 | 20.5             | 29.1             | 53             | 86             | 2                | 7                | 482617.67                                     | 41739.24                                       | 9                    |
| Ethyl-<br>Chlorpyrifos | 12/07/2017 | 22.3             | 30.7             | 53             | 86             | 2                | 7                | 116716.84                                     | 91244.56                                       | 78                   |
| Azadirachtin           | 01/08/2017 | 19.2             | 21.1             | 64             | 70             | 2                | 6                | 219543.32                                     | 27442.93                                       | 13                   |
| Azadirachtin           | 02/08/2017 | 25.8             | 27.3             | 78.5           | 82             | 6                | 20               | 185321.3                                      | 30886.88                                       | 17                   |
| Azadirachtin           | 01/09/2017 | 21.7             | 24.3             | 69.7           | 85             | 5                | 15               | 122456.41                                     | 30614.25                                       | 25                   |
| Azadirachtin           | 25/09/2017 | 18.8             | 31.5             | 23.8           | 71.5           | 4                | 25               | 98143.78                                      | 40893.24                                       | 42                   |
| Metalaxyl              | 04/09/2017 | 19.6             | 28.3             | 59.7           | 82.7           | 2                | 15               | 7311.19                                       | ND*                                            |                      |

\* Upwind sampler

**Table S7.** Relationship between atmospheric parameters and drift effect.  
Conventional treatment, 2018 season.

| Pesticide     | Day        | Temp.Min<br>(°C) | Temp.Max<br>(°C) | Hum.Min<br>(%) | Hum.Max<br>(%) | WS.Min<br>(Km/h) | WS.Max<br>(Km/h) | Conc. Crop.<br>Sampler<br>(pg/m <sup>3</sup> ) | Conc. Drift<br>Sampler<br>(pg/m <sup>3</sup> ) | %<br>Drift<br>Effect |
|---------------|------------|------------------|------------------|----------------|----------------|------------------|------------------|------------------------------------------------|------------------------------------------------|----------------------|
| Imidacloprid  | 17/04/2018 | 11.3             | 23.8             | 39             | 80             | 4                | 9.3              | 12432.21                                       | 103.22*                                        | 1                    |
| Imidacloprid  | 06/07/2018 | 25.2             | 29.2             | 55             | 70             | 10               | 20.4             | 221,350.91                                     | 98,765.23                                      | 45                   |
| Imidacloprid  | 18/07/2018 | 26               | 31.1             | 52             | 74             | 10               | 22.2             | 198,745.32                                     | 104,843.21                                     | 53                   |
| Imidacloprid  | 08/08/2018 | 27.3             | 34.8             | 30             | 54             | 5                | 14               | 471,342.25                                     | 29,839.41**                                    | 6                    |
| Oxamilo       | 30/04/2018 | 18.5             | 19.4             | 33             | 39             | 20               | 37               | 9643.22                                        | 98.71*                                         | 1                    |
| Difenoconazol | 15/05/2018 | 20.6             | 23.8             | 41             | 48             | 10               | 26               | 77,432.25                                      | 987.42**                                       | 1                    |
| Difenoconazol | 11/06/2018 | 19.6             | 25.5             | 45             | 64             | 15               | 27.8             | 103,567.22                                     | 12,432.21*                                     | 12                   |
| Acetamiprid   | 18/05/2018 | 15               | 23.7             | 46             | 79             | 10               | 18.5             | 11,032.22                                      | 208.21**                                       | 2                    |
| Acetamiprid   | 21/06/2018 | 22.7             | 31.3             | 37             | 66             | 10               | 18.5             | 77,435.03                                      | 6453.21                                        | 8                    |
| Azoxistrobin  | 25/05/2018 | 19.4             | 20.5             | 81             | 85             | 25               | 37               | 112,435.76                                     | 77,432.18                                      | 69                   |
| Bupirimate    | 31/05/2018 | 19.2             | 28.1             | 39             | 69             | 9                | 13               | 9341.32                                        | 83.12**                                        | 1                    |
| Bupirimate    | 22/06/2018 | 23.4             | 33.5             | 27             | 57             | 10               | 25               | 8765.32                                        | 187.21**                                       | 2                    |
| Fosetyl-Al    | 12/06/2018 | 21               | 27.5             | 38             | 57             | 10               | 25.9             | 187,431.22                                     | 79,987.63                                      | 43                   |
| Fosetyl-Al    | 13/09/2018 | 21.6             | 29.7             | 52             | 87             | 2                | 9.3              | 7311.18                                        | 825.42                                         | 11                   |
| Oxifluorfen   | 09/07/2018 | 25.9             | 32.2             | 43             | 63             | 2                | 20.1             | 10,022.12                                      | 216.15**                                       | 2                    |

|                        |            |      |      |    |    |     |      |            |           |    |
|------------------------|------------|------|------|----|----|-----|------|------------|-----------|----|
| Methyl-<br>Clorpirifos | 27/06/2018 | 25.1 | 29.7 | 53 | 72 | 2   | 20.1 | 167,398.91 | 92,334.78 | 55 |
| Methyl-<br>Clorpirifos | 16/07/2018 | 26.3 | 32.2 | 25 | 39 | 15  | 28.2 | 104,341.3  | 13,007.61 | 12 |
| Methyl-<br>Clorpirifos | 30/07/2018 | 25.2 | 30.4 | 35 | 58 | 10  | 22.5 | 478,580.43 | 29,566.3* | 6  |
| Azadirachtin           | 04/07/2018 | 22.6 | 29.3 | 57 | 88 | 2   | 13   | 98,435.61  | 1022.47** | 1  |
| Azadirachtin           | 01/08/2018 | 26.6 | 34.1 | 33 | 66 | 5   | 14   | 47,231.98  | 522.23    | 1  |
| Azadirachtin           | 20/08/2018 | 23.3 | 29.6 | 33 | 53 | 2   | 9.7  | 101,232.3  | 9655.43** | 10 |
| Azadirachtin           | 21/08/2018 | 24.2 | 30.4 | 33 | 53 | 0,5 | 8    | 76,976.22  | 732.08    | 1  |
| Azadirachtin           | 03/08/2018 | 25.6 | 29.5 | 69 | 83 | 5   | 14.8 | 41,232.21  | 437.86*   | 1  |
| Azadirachtin           | 12/09/2018 | 22.2 | 29.8 | 53 | 93 | 2   | 7.4  | 55,789.31  | 340.82    | 1  |
| Azadirachtin           | 18/09/2018 | 22.1 | 27.9 | 64 | 87 | 5   | 7.4  | 27,632.11  | 9872.32   | 36 |
| Azadirachtin           | 01/10/2018 | 17.9 | 26.1 | 52 | 88 | 5   | 16.5 | 28,901.32  | 6576.21   | 23 |
| Azadirachtin           | 11/10/2018 | 17.4 | 25.4 | 61 | 87 | 5   | 9.3  | 131,567.22 | 8342.11   | 6  |
| Lambda-<br>Cyhalotrin  | 19/09/2018 | 21.7 | 27.7 | 63 | 90 | 2   | 11.1 | 122,723.91 | 7965.22   | 6  |
| Lambda-<br>Cyhalotrin  | 02/10/2018 | 16.5 | 24.5 | 38 | 74 | 4   | 13   | 95,813.04  | 10,570.65 | 11 |
| Lambda-<br>Cyhalotrin  | 15/10/2018 | 16.4 | 21.6 | 44 | 62 | 20  | 38.9 | 50,671.74  | 6506.52*  | 13 |

---

\* Upwind sampler \*\*Variable wind during the application

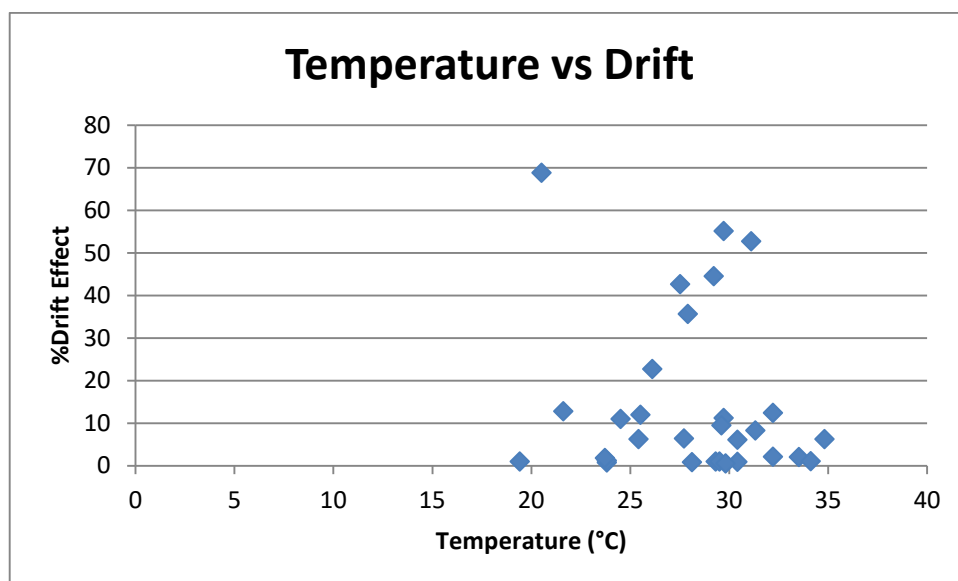

**Figure S1.** Temperature vs Drift effect



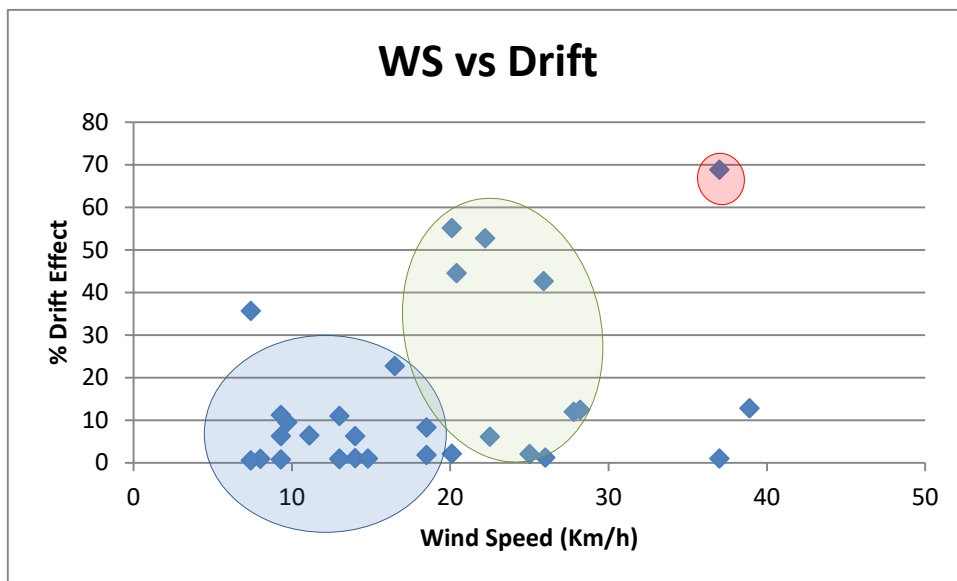

Figure S2. Wind speed vs Drift effect

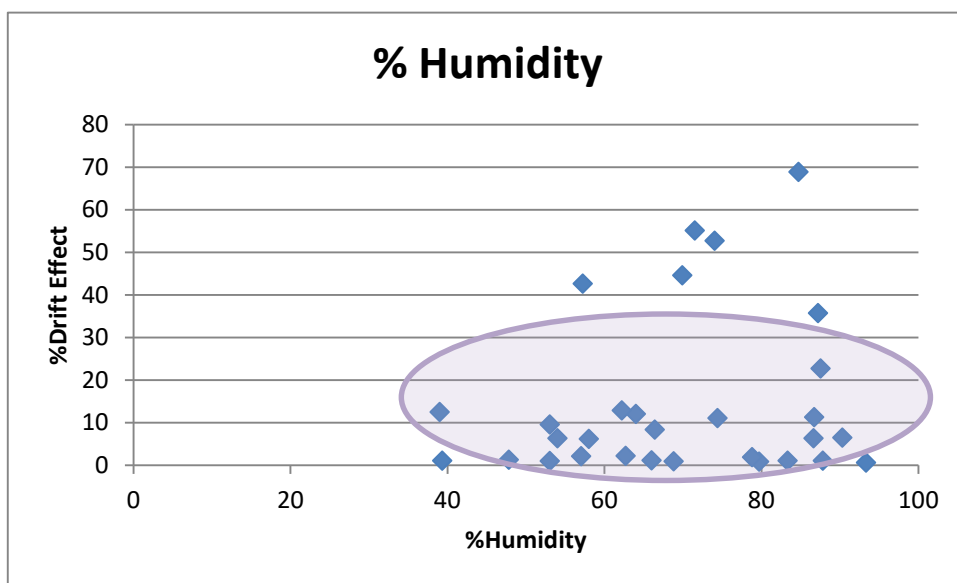

Figure S3. Humidity vs Drift effect
